# Supplementary material for: An innovative reversed-phase monolithic column modified with 4-vinylbiphenyl and ionic liquid stationary phases for capillary electrochromatography
Source: Royal Society of Chemistry journal article supplement (doi:10.1039/c9nj02116g), 2019-01-01
Supplement: c9nj02116g1.pdf [file c9nj02116g1.pdf]

## Supporting Information

### **Innovative reversed-phase monolithic column modified with 4-vinylbiphenyl and ionic liquid stationary phases for capillary electrochromatography**

**Xiangju Mao**<sup>\*1,2,3,4</sup> **Lu Liu**<sup>1,2,3,4</sup> **Fang Xiao**<sup>1,2,3,4</sup> **Wenshan Ni**<sup>1,2,3,4</sup> **Xintao Cheng**<sup>1,2,3,4</sup>

*1. Zhengzhou Institute of Multipurpose Utilization of Mineral Resources, CAGS, Zhengzhou 450006, P. R. China; 2. China National Engineering Research Center for utilization of Industrial Minerals, Zhengzhou 450006, P. R. China; 3. Key Laboratory of Evaluation and Multipurpose Utilization of Polymetallic Ores, MLR, Zhengzhou 450006, P. R. China; 4. Northwest China Center for Geoscience Innovation, Xi'an 710054, P. R. China)*

\*Corresponding author, fax: 86-371-68632057, email: nancy\_mao\_mao@163.com,  
address: 328 Longhai west Road, 450006, Zhengzhou, P. R. China

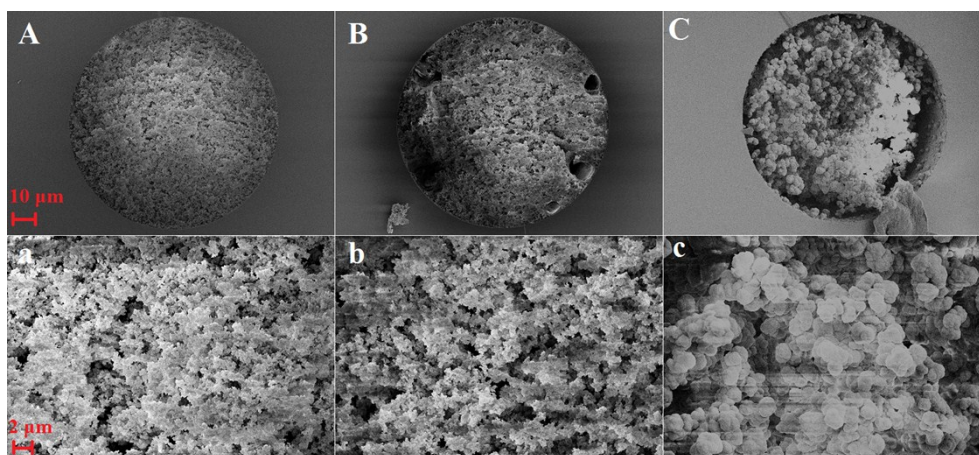

**Fig. S1.** Characterization of SEM for the monoliths (column 6: A, 750 ×; a, 3000 ×. Column 7: B, 750 ×; b, 3000 ×; Column 8: C, 750 ×; c, 3000 ×;).

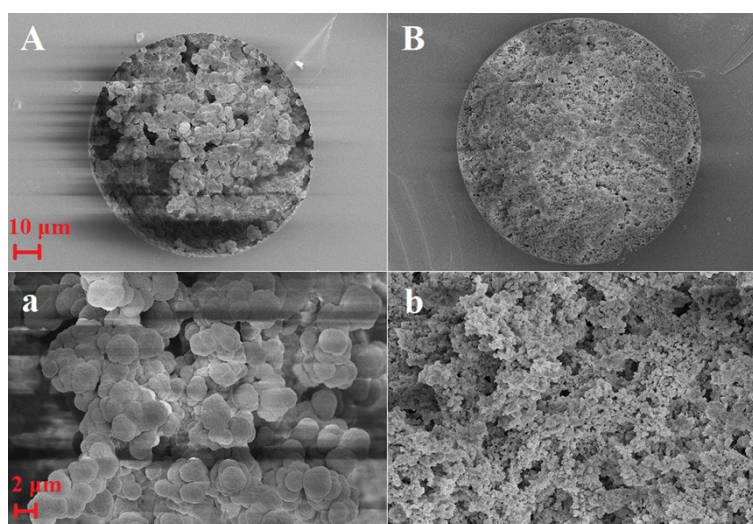

**Fig. S2.** Characterization of SEM for the monoliths (column 9: A, 750 ×; a, 3000 ×. Column 10: B, 750 ×; b, 3000 ×.).

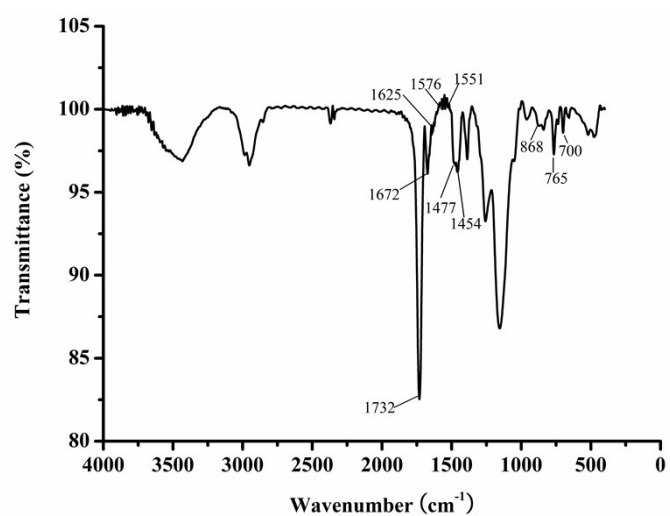

**Fig. S3.** FT-IR spectra of the monolithic column 4.

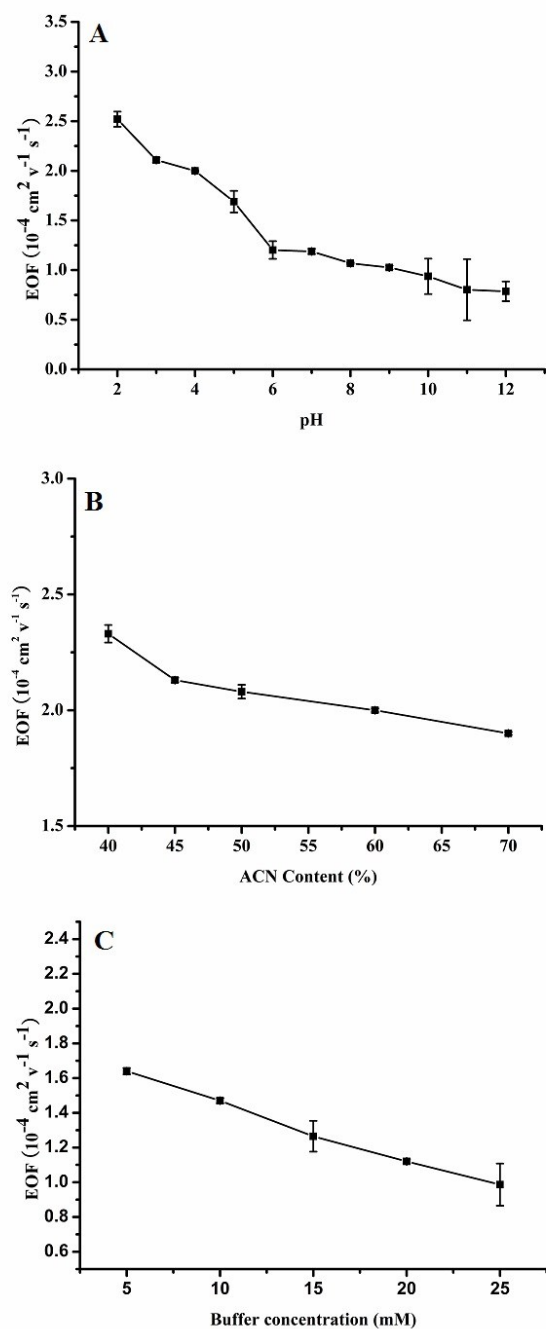

**Fig. S4.** Influence of pH (A), acetonitrile content (B), buffer concentration (C) to the EOF mobility on monolithic column 4. Experimental conditions: mobile phase, (A) 10 mM phosphate buffer (pH 2.0–12.0) with 60% acetonitrile, (B) phosphate buffer (10 mM, pH 4.0) with different content acetonitrile, (C) pH 4.0 phosphate buffer (5.0–25.0 mM) with 60% acetonitrile; applied voltage,  $-20 \text{ kV}$ ; electrokinetic injection,  $-5 \text{ kV} \times 5 \text{ s}$ ; detection wavelength, 214 nm; EOF marker, thiourea.

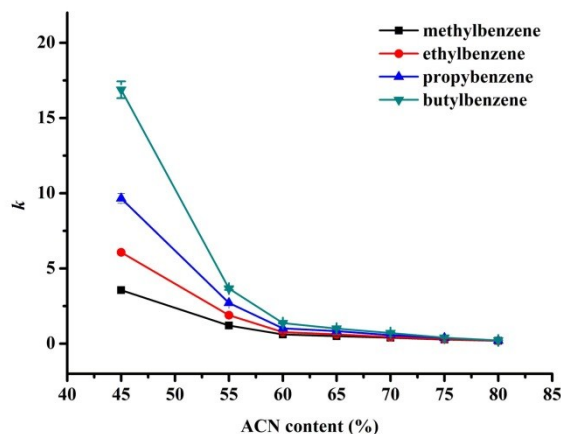

**Fig. S5.** Relationship between retention factors and acetonitrile content on the column 4 using alkylbenzenes as analytes and thiourea as EOF mobility marker. The experimental conditions are same as Fig. 3.

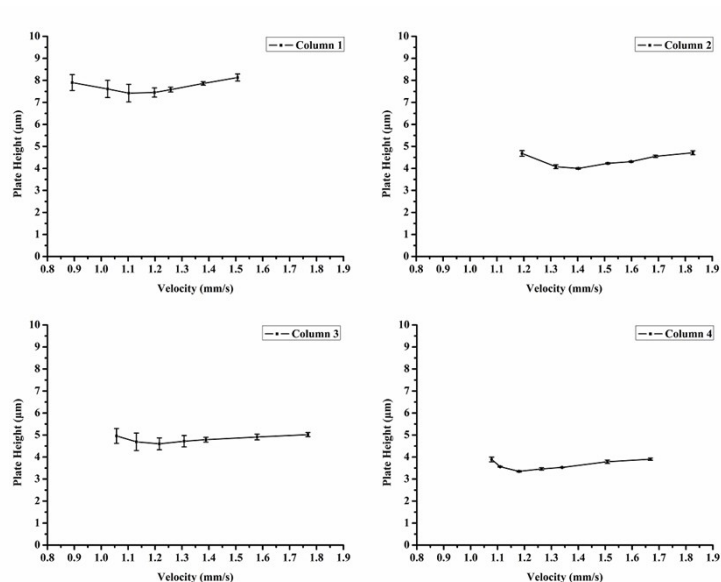

**Fig. S6.** Relationship between the plate height and linear velocity using toluene as test analyte. Experimental conditions: mobile phase, 60% acetonitrile in pH 4.0 10 mM phosphate buffer; applied voltage, from  $-10$  kV to  $-25$  kV; electrokinetic injection,  $-5$  kV  $\times$  5 s; detection wavelength, 214 nm.

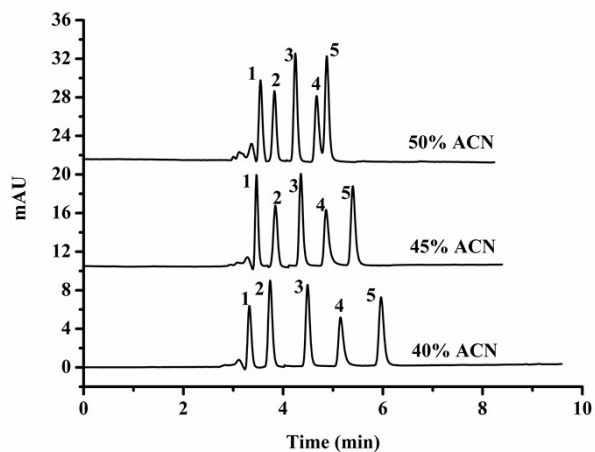

**Fig. S7.** Separation of phenols. Experimental conditions: mobile phase, 40% – 50% acetonitrile in pH 4.0 phosphate buffer; applied voltage, – 20 kV; electrokinetic injection, – 5 kV × 5 s; detection wavelength, 214 nm. Peaks: 1, thiourea; 2, phloroglucinol; 3, hydroquinone; 4, resorcinol; 5, phenol.

**Table S1**Compositions of the polymerization mixtures for the poly (VBP-*co*-EDMA-*co*-IL) prepared in this study.

| Column | Monomers/porogens<br>(wt%) | Monomers |                                     |      | Porogens |            |           | Backpressure<br>(MPa) | Permeability<br>(10 <sup>-13</sup> m <sup>2</sup> ) |
|--------|----------------------------|----------|-------------------------------------|------|----------|------------|-----------|-----------------------|-----------------------------------------------------|
|        |                            | VBP      | AlMeIm <sup>+</sup> Cl <sup>-</sup> | EDMA | DMF      | n-Propenal | Dodecanol |                       |                                                     |
| 1      | 20:80                      | 18       | 42                                  | 40   | 50       | 15         | 35        | 0.6 MPa               | 2.09                                                |
| 2      | 20:80                      | 15       | 35                                  | 50   | 50       | 15         | 35        | 0.9 MPa               | 1.39                                                |
| 3      | 20:80                      | 8        | 32                                  | 60   | 50       | 15         | 35        | 2.7 Mpa               | 0.46                                                |
| 4      | 20:80                      | 12       | 28                                  | 60   | 50       | 15         | 35        | 2.5 Mpa               | 0.50                                                |
| 5      | 20:80                      | 16       | 24                                  | 60   | 50       | 15         | 35        | 6.8 MPa               | 0.18                                                |
| 6      | 20:80                      | 12       | 28                                  | 60   | 50       | 50         | 0         | Blocked               | -                                                   |
| 7      | 20:80                      | 12       | 28                                  | 60   | 50       | 35         | 15        | 5.9 MPa               | 0.21                                                |
| 8      | 20:80                      | 12       | 28                                  | 60   | 50       | 0          | 50        | 0.5 MPa               | 2.51                                                |
| 9      | 10:90                      | 12       | 28                                  | 60   | 50       | 15         | 35        | 0.2 MPa               | 6.28                                                |
| 10     | 30:70                      | 12       | 28                                  | 60   | 50       | 15         | 35        | Blocked               | -                                                   |
